## Articles of interest in other COB journals

From *Journal of Cell Science*

### **Dual role for microtubules in regulating cortical contractility during cytokinesis**

Kausalya Murthy and Patricia Wadsworth

Murthy, K. and Wadsworth, P., 2008. *J. Cell Sci.* doi: 10.1242/jcs.027052

### **In migrating cells, the Golgi complex and the position of the centrosome depend on geometrical constraints of the substratum**

François Pouthas, Philippe Girard, Virginie Lecaudey, Thi Bach Nga Ly, Darren Gilmour, Christian Boulin, Rainer Pepperkok and Emmanuel G. Reynaud

Pouthas, F. et al. 2008. *J. Cell Sci.* doi: 10.1242/jcs. 026849
